# Supplementary material for: ZnO photoelectrode simultaneously modified with Cu2O and Co-Pi based on broader light absorption and efficiently photogenerated carrier separation
Source: Royal Society of Chemistry journal article supplement (doi:10.1039/c8qi00596f), 2018-01-01
Supplement: c8qi00596f1.pdf [file c8qi00596f1.pdf]

---

**Supporting Information for**  
**ZnO photoelectrode simultaneous modified with Cu<sub>2</sub>O and Co-Pi**  
**based on broaden light absorption and efficient photogenerated**  
**carriers separation**

Chonghao Ma<sup>1,2</sup>, Zhifeng Liu<sup>1,2\*</sup>, Qijun Cai<sup>1,2</sup>, Changcun Han<sup>1,2</sup>, Zhengfu Tong<sup>1,2</sup>  
(1 Hubei Collaborative Innovation Center for High-efficiency Utilization of Solar  
Energy, Hubei University of Technology, Wuhan, 430068, China. 2 School of  
Science, Hubei University of Technology, Wuhan, 430068, China.)

\* corresponding author E-mail: address: tjulzf@163.com

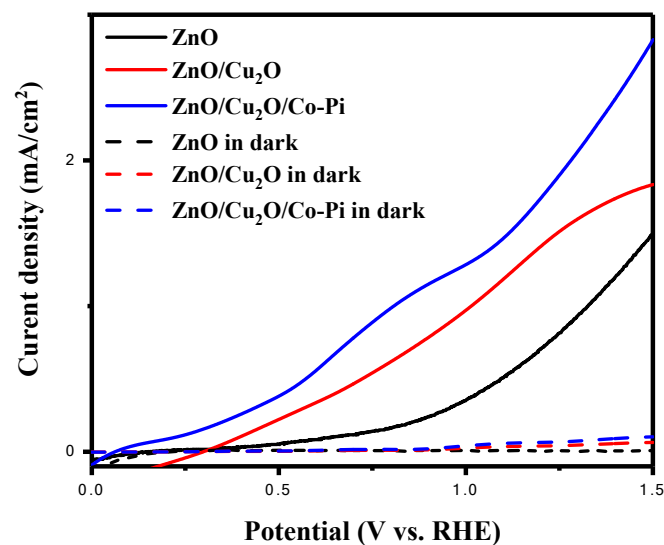

Fig.S1 Current density-voltage (i-v) curves under simulated sunlight illumination and  
in dark

---

\* corresponding author E-mail: address: tjulzf@163.com

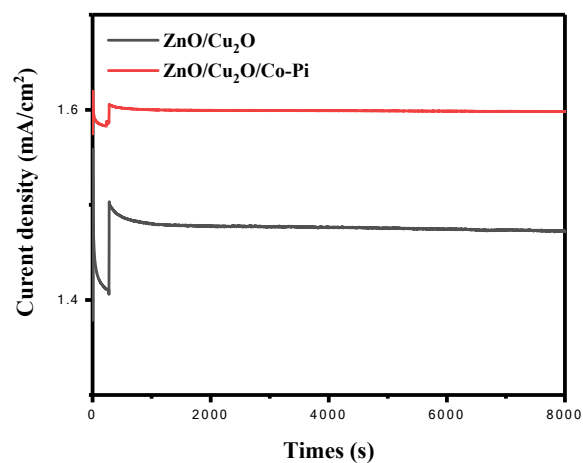

Fig.S2 Photocurrent density–time curves of ZnO/Cu<sub>2</sub>O and ZnO/Cu<sub>2</sub>O/Co-Pi photoelectrodes measured in 0.5 M Na<sub>2</sub>SO<sub>4</sub> electrolyte at 1.23 V vs RHE under simulated sunlight illumination for 10 h
